# Supplementary material for: In situ surface-enhanced Raman scattering and X-ray photoelectron spectroscopic investigation of coenzyme Q10on silver electrode
Source: Royal Society of Chemistry journal article supplement (doi:10.1039/c0cp01449d), 2010-12-08
Supplement: c0cp01449d.pdf [file c0cp01449d.pdf]

Electronic Supplementary Information  
***In-situ* surface-enhanced Raman scattering and X-ray  
photoelectron spectroscopic investigation of coenzyme Q<sub>10</sub> on  
silver electrode**

**Dan Li,<sup>a</sup> Da-Wei Li,<sup>a</sup> John S. Fossey<sup>a, b</sup> and Yi-Tao Long<sup>a\*</sup>**

*a Key Laboratory for Advanced Materials & Department of Chemistry, East China  
University of Science and Technology, Shanghai, 200237, P. R. China*

*b School of Chemistry, University of Birmingham, Edgbaston, Birmingham, B15  
2TT, UK*

*\*corresponding author: ytlong@ecust.edu.cn*

**Table S1** The intensities and band assignments in Raman spectra and SERS spectra of CoQ<sub>10</sub>

| Observed frequency ( $\nu/\text{cm}^{-1}$ ) |                      |                                            |               |
|---------------------------------------------|----------------------|--------------------------------------------|---------------|
| Solid                                       | SERS on Ag electrode | Assignment                                 | EF ( $10^3$ ) |
| 2965 (w)                                    | 2973 (m)             | Symmetric =CII stretching                  | 0.9           |
| 2933 (m)                                    | 2928 (s)             | Antisymmetric CH <sub>2</sub> stretching   | 0.7           |
| 2891 (m)                                    | 2878 (m)             | Symmetric (CH <sub>2</sub> )C-H stretching | 0.4           |
| 1662 (s)                                    | 1651 (s)             | C=O stretching                             | 0.5           |
| 1609 (w)                                    | 1607 (m)             | C=C stretching                             | 1.0           |
| 1440 (w)                                    | 1450 (m)             | Asymmetric CH <sub>2</sub> deformation     | 0.9           |
| 1281 (m)                                    | 1276 (w)             | C-OCH <sub>3</sub> stretching              | 0.2           |
| 1101 (w)                                    | 1096 (m)             | OCH <sub>3</sub> stretching                | 3.2           |
| 1038 (w)                                    | 1048 (m)             | C-H deformation                            | 2.4           |
| 995 (m)                                     | 999 (m)              | Ring breathing                             | 0.8           |
| 876 (w)                                     | 883 (s)              | C-H out-of-plane deformation               | 4.5           |

s-strong, m-medium, w-weak, Ø-phenyl

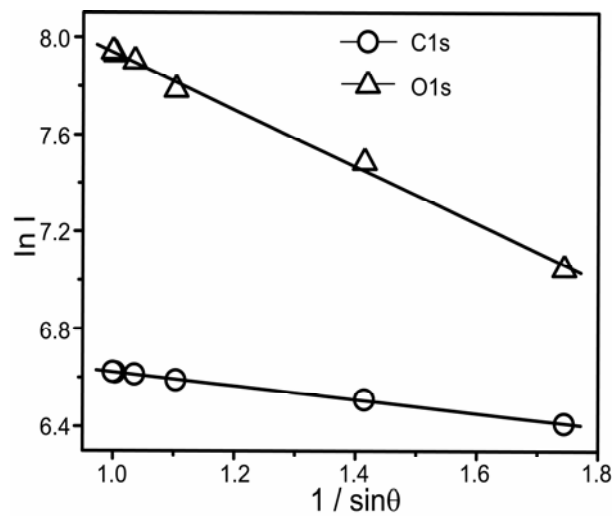

**Fig. S1** The logarithm of intensity of C1s (circles) and O 1s (triangles) as a function of  $1/\sin\theta$ , where  $\theta$  is the take-off angle.

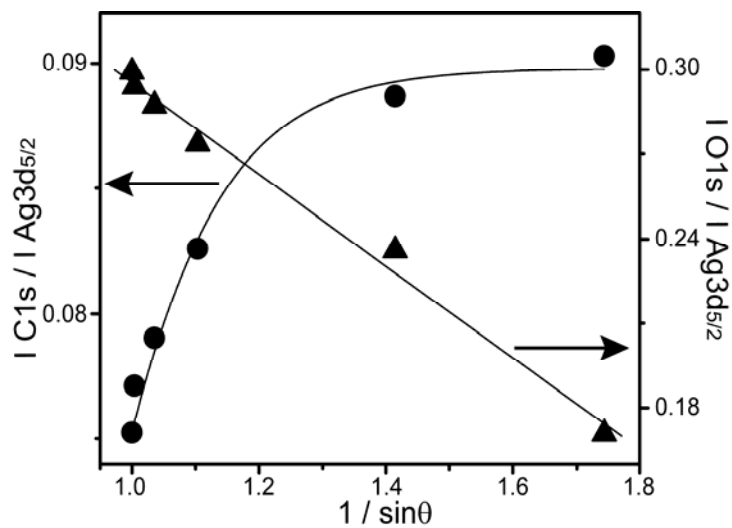

**Fig. S2** The C1s/Ag3d<sub>5/2</sub> (circles) and O1s/Ag3d<sub>5/2</sub> (triangles) experimental intensity ratios as a function of 1/sinθ, where θ is the take-off angle.

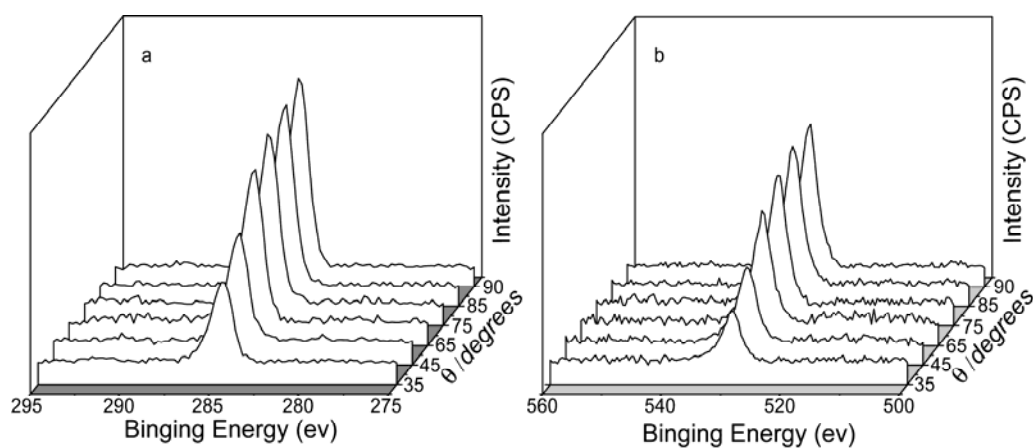

**Fig. S3** High-resolution C1s (a) and O1s (b) XPS spectra for CoQ<sub>0</sub> self-assembled on Ag surface measured at different take-off angles,  $\theta$  is the take-off angle.

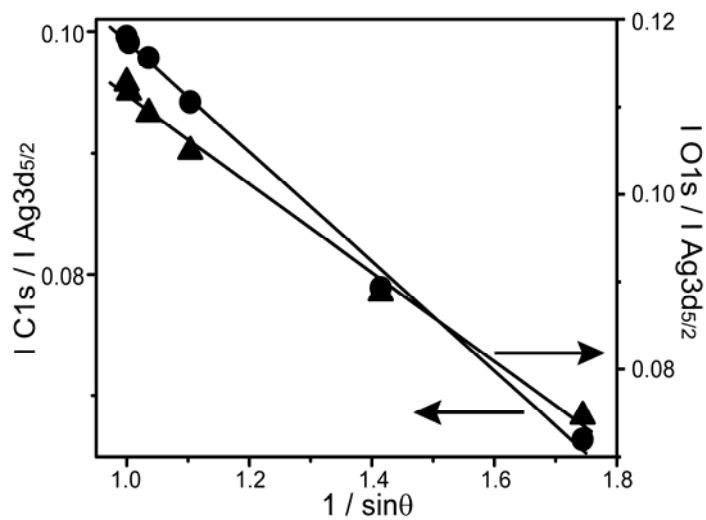

**Fig. S4** The C1s/Ag3d<sub>5/2</sub> (circles) and O1s/Ag3d<sub>5/2</sub> (triangles) experimental intensity ratios as a function of 1/sin $\theta$ , where  $\theta$  is the take-off angle.

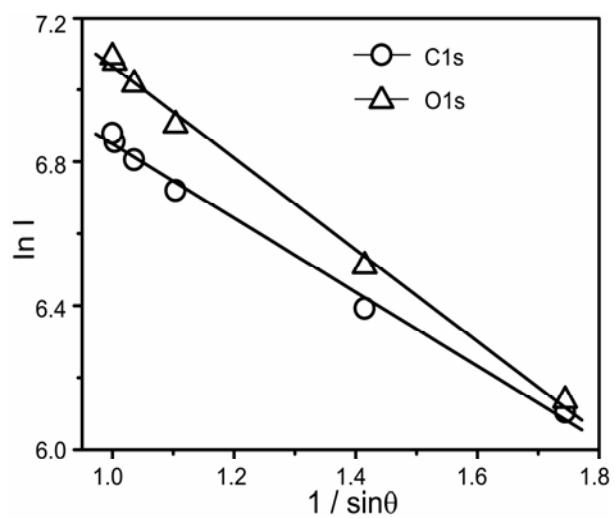

**Fig. S5** The logarithm of intensity of C1s (circles) and O1s (triangles) as a function of  $1/\sin\theta$ , where  $\theta$  is the take-off angle.
